# Supplementary material for: Gut Microbiota Profile in Children with IgE-Mediated Cow’s Milk Allergy and Cow’s Milk Sensitization and Probiotic Intestinal Persistence Evaluation
Source: PubMed Central journal article supplement (PMC7915344; doi:10.3390/ijms22041649), 2021-02-06
Supplement: ijms-22-01649-s001.pdf [file ijms-22-01649-s001.pdf]

### Supplementary Materials

The supplementary Materials contain: 3 Supplementary Figures, 8 Supplementary Tables (Supplementary Tables 1–8).  
**Supplementary Figures**

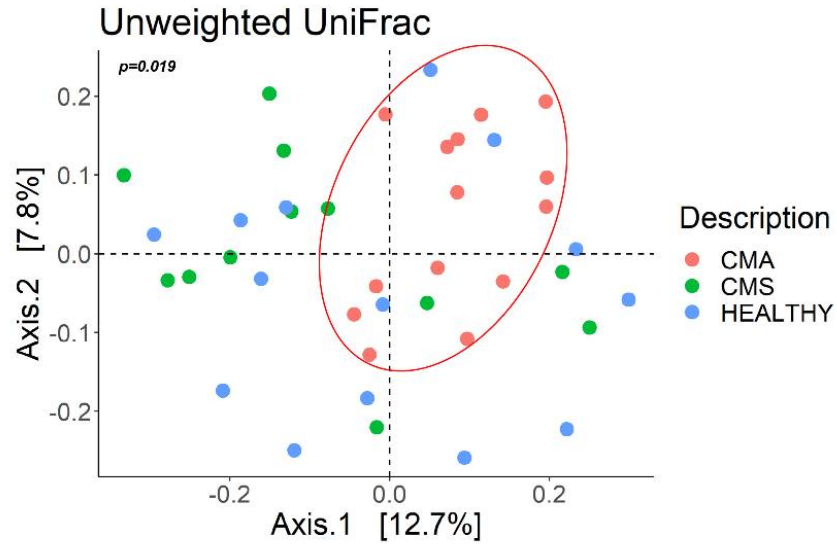

**Supplementary Figure S1.** Beta-diversity analysis applied for CMA, CMS and Healthy samples. The plots show the first two principal axes for PCoA using unweighted UniFrac algorithm.  $p$ -value obtained by PERMANOVA analyses is reported.

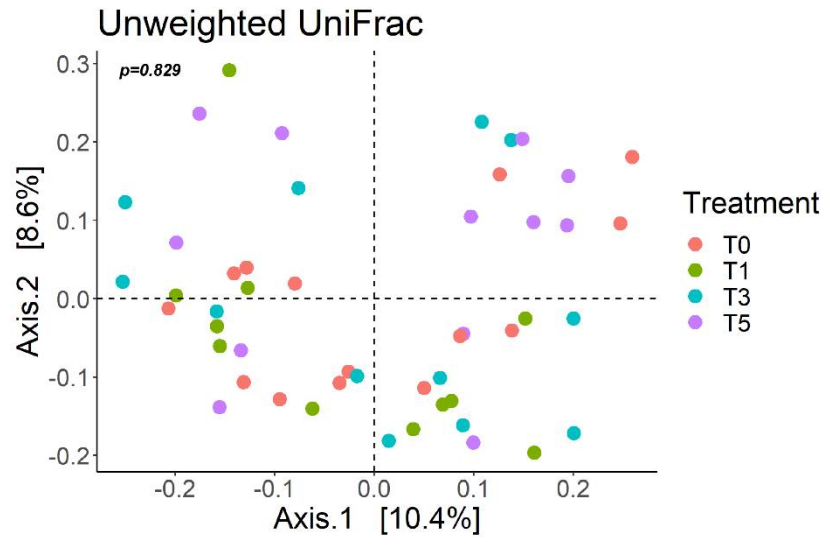

**Supplementary Figure S2.** Beta-diversity analysis applied for all the time points of the CMA group. The plots show the first two principal axes for PCoA using unweighted UniFrac algorithm.  $p$ -value obtained by PERMANOVA analyses is reported.

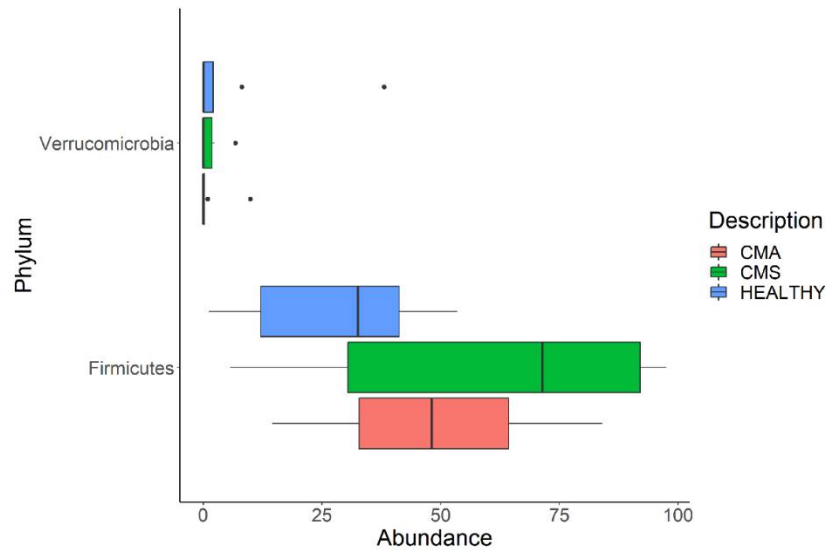

**Supplementary Figure S3.** OTU distribution of the gut microbiota for the 3 groups' comparison assessed by DeSeq2 test at phylum level. The interquartile range is represented by the box and the line in the box is the median. The whiskers indicate the largest and the lowest data points, respectively, while the dots symbolize outliers. Only statistically significant OTUs ( $p < 0.05$ ) are plotted.

#### Supplementary Tables.

**Supplementary Table S1.** Primers and probes designed for *B. breve*, *B. longum* subsp. *longum* and *B. longum* subsp. *infantis* for the Real Time assays.

| Species specificity                     | Primer or probe                   | Sequence                                | Product size |
|-----------------------------------------|-----------------------------------|-----------------------------------------|--------------|
| <i>B. breve</i>                         | Fw_Bbreve                         | 5'-gTg gTg gCT TgA gAA CTg gAT Ag 3'    | 117 bp       |
|                                         | Rv_Bbreve                         | 5'-CAA AAC gAT CgA AAC AAA CAC TAA A-3' |              |
|                                         | P_Bbreve                          | 5'-FAM-CGC ACC CAC CGC A-BHQ-3'         |              |
| <i>B. longum</i> subsp. <i>longum</i>   | Fw_Blongum subsp. <i>longum</i>   | 5'-Tgg AAg ACg TCg TTg gCT TT-3'        | 109 bp       |
|                                         | Rv_Blongum subsp. <i>longum</i>   | 5'-ATC gCg CCA ggC AAA A-3'             |              |
|                                         | P_Blongum subsp. <i>longum</i>    | 5'-FAM-CGC ACC CAC CGC A-BHQ-3'         |              |
| <i>B. longum</i> subsp. <i>infantis</i> | Fw_Blongum subsp. <i>infantis</i> | 5'-CTC CTT TCT ACg gAg AAT ACA ggA T-3' | 113 bp       |
|                                         | Rv_Blongum subsp. <i>infantis</i> | 5'-gAA CCg AAA gCC CAT gAT CT-3'        |              |
|                                         | P_Blongum subsp. <i>infantis</i>  | 5'-CgC gAT ggT CgC gTg Tgg A-3'         |              |

**Supplementary Table S2.** Wilcoxon Signed Rank Test applied for *B. breve*, *B. longum* and *B. infantis* amount comparisons within each of the three CMA, CMS, HEALTHY groups.

| Probiotic Species                      | CMA          | CMS                     | HEALTHY      |
|----------------------------------------|--------------|-------------------------|--------------|
| Paired comparison                      |              | $p$ -value <sup>1</sup> |              |
| <i>B. breve</i> vs <i>B. longum</i>    | 0.311        | 0.600                   | 0.055        |
| <i>B. breve</i> vs <i>B. infantis</i>  | <b>0.004</b> | 0.138                   | <b>0.006</b> |
| <i>B. longum</i> vs <i>B. infantis</i> | <b>0.003</b> | 0.068                   | <b>0.001</b> |

<sup>1</sup> values in bold are statistically significant.

**Supplementary Table S3.** Wilcoxon Signed Ranks Test applied for *B. breve*, *B. longum* and *B. infantis* amount between CMA, CMS, and HEALTHY group paired comparisons.

| <i>B. breve</i> | <i>B. longum</i> | <i>B. infantis</i> |
|-----------------|------------------|--------------------|
|-----------------|------------------|--------------------|

| Group          | <i>p</i> -value | Group          | <i>p</i> -value | Group          | <i>p</i> -value |
|----------------|-----------------|----------------|-----------------|----------------|-----------------|
| CMA vs CMS     | 0.116           | CMA vs CMS     | 0.463           | CMA vs CMS     | 0.285           |
| CMA vs HEALTHY | 0.279           | CMA vs HEALTHY | 0.753           | CMA vs HEALTHY | 0.500           |
| CMS vs HEALTHY | 0.686           | CMS vs HEALTHY | 0.463           | CMS vs HEALTHY | 1               |

**Supplementary Table S4.** Wilcoxon Signed Ranks Test applied for the time point comparisons of *B. breve*, *B. longum* and *B. infantis* values in the CMA group.

| Groups  | <i>B. breve</i> | <i>B. longum</i> subsp. <i>longum</i> | <i>B. longum</i> subsp. <i>infantis</i> |
|---------|-----------------|---------------------------------------|-----------------------------------------|
|         | <i>p</i> value  |                                       |                                         |
| T1 - T0 | 0.480           | 0.433                                 | <b>0.003</b>                            |
| T2 - T0 | 0.433           | 0.272                                 | <b>0.01</b>                             |
| T3 - T0 | 0.091           | 0.182                                 | <b>0.005</b>                            |
| T4 - T0 | <b>0.019</b>    | 0.875                                 | <b>0.016</b>                            |
| T5 - T0 | <b>0.008</b>    | 0.477                                 | 0.173                                   |
| T2 - T1 | 0.433           | 0.875                                 | 0.084                                   |
| T3 - T1 | 0.213           | 0.929                                 | 0.093                                   |
| T4 - T1 | 0.583           | 0.209                                 | 0.48                                    |
| T5 - T1 | <b>0.010</b>    | 0.477                                 | 0.374                                   |
| T3 - T2 | 0.182           | 1.000                                 | 0.248                                   |
| T4 - T2 | 0.814           | 0.182                                 | 0.388                                   |
| T5 - T2 | <b>0.008</b>    | 0.859                                 | 0.131                                   |
| T4 - T3 | 0.722           | 0.062                                 | 0.721                                   |
| T5 - T3 | 0.139           | 0.959                                 | 0.374                                   |
| T5 - T4 | <b>0.016</b>    | <b>0.037</b>                          | 0.799                                   |

values in bold are statistically significant.

**Supplementary Table S5.** DeSeq2 test statistically significant results for CMA, CMS and HEALTHY group comparison at phylum level. For each group mean relative abundances of phyla are reported.

| Phylum          | CMA     | CMS     | HEALTHY | <i>p</i> value |
|-----------------|---------|---------|---------|----------------|
| Firmicutes      | 46.7057 | 59.8204 | 28.2082 | <b>0.034</b>   |
| Verrucomicrobia | 1.38533 | 1.33902 | 5.82754 | <b>0.00011</b> |

**Supplementary Table S6.** DeSeq2 test statistically significant results for CMA, CMS and HEALTHY group comparison at genus level. For each group mean relative abundances of genus are reported.

| Phylum         | Genus                     | CMA     | CMS     | HEALTHY | p value        |
|----------------|---------------------------|---------|---------|---------|----------------|
| Proteobacteria | <i>Pasteurellaceae;g_</i> | 0.08007 | 0.00318 | 0.02793 | <b>0.01227</b> |
| Proteobacteria | <i>Actinobacillus</i>     | 0.26436 | 0.01586 | 0.01954 | <b>0.01415</b> |
| Proteobacteria | <i>Haemophilus</i>        | 4.33221 | 0.70116 | 0.23531 | <b>0.0399</b>  |
| Proteobacteria | <i>Erwinia</i>            | 1.75906 | 0.08571 | 0.19719 | <b>0.01227</b> |
| Proteobacteria | <i>Klebsiella</i>         | 6.87882 | 0.19301 | 2.65591 | <b>0.0011</b>  |
| Bacteroidetes  | <i>Prevotella</i>         | 0.6829  | 0.03561 | 0.04084 | <b>0.01827</b> |
| Bacteroidetes  | <i>Parabacteroides</i>    | 0.01198 | 0.07964 | 0.21774 | <b>0.01827</b> |
| Firmicutes     | <i>Granulicatella</i>     | 0.02863 | 0.03899 | 0.00551 | <b>0.0399</b>  |
| Firmicutes     | <i>Streptococcus</i>      | 2.26979 | 0.70702 | 0.28369 | <b>0.01744</b> |
| Firmicutes     | <i>Anaerotruncus</i>      | 0       | 0.17253 | 0.00675 | <b>0.00896</b> |
| Firmicutes     | <i>Ruminococcaceae_g_</i> | 1.09775 | 6.97716 | 1.94288 | <b>0.01415</b> |

values in bold are statistically significant.

**Supplementary Table S 7.** DeSeq2 test statistically significant results for T<sub>0</sub>, T<sub>1</sub>, T<sub>3</sub> and T<sub>5</sub> group comparison at phylum level. For each group mean relative abundances of phyla are reported.

| Phylum          | T <sub>0</sub> | T <sub>1</sub> | T <sub>3</sub> | T <sub>5</sub> | p value                       |
|-----------------|----------------|----------------|----------------|----------------|-------------------------------|
| Actinobacteria  | 27.702         | 42.6975        | 46.95328742    | 32.8538        | <b>0.004816519</b>            |
| Proteobacteria  | 31.483         | 4.32714        | 11.90355827    | 0.72093        | <b>0.004934564</b>            |
| Verrucomicrobia | 2.02595        | 0.85829        | 4.688481257    | 0.02854        | <b>9.08 × 10<sup>-9</sup></b> |

values in bold are statistically significant.

**Supplementary Table S8.** DeSeq2 test statistically significant results for T<sub>0</sub>, T<sub>1</sub>, T<sub>3</sub> and T<sub>5</sub> group comparison at genus level. For each group mean relative abundances of genus are reported.

| Phylum          | Genus/Species        | T <sub>0</sub> | T <sub>1</sub> | T <sub>3</sub> | T <sub>5</sub> | p value                       |
|-----------------|----------------------|----------------|----------------|----------------|----------------|-------------------------------|
| Actinobacteria  | <i>Actinomyces</i>   | 0.04224        | 0.035964078    | 0.00834        | 0.00099        | <b>0.004550742</b>            |
| Verrucomicrobia | <i>Akkermansia</i>   | 0.02134        | 2.75815        | 0.16394        | 16.1942        | <b>0.00317937</b>             |
| Firmicutes      | <i>Blautia</i>       | 1.54716        | 2.217692621    | 0.25798        | 0.24496        | <b>0.033548925</b>            |
| Firmicutes      | <i>Enterococcus</i>  | 0              | 0.543750424    | 0.00346        | 0              | <b>0.023335909</b>            |
| Bacteroidetes   | <i>Prevotella</i>    | 0.01077        | 0.018769552    | 0              | 0.00137        | <b>0.04779255</b>             |
| Firmicutes      | <i>Ruminococcus</i>  | 0.0397         | 0.006703222    | 0.00947        | 0.08133        | <b>0.033548925</b>            |
| Firmicutes      | <i>Streptococcus</i> | 0.49146        | 0.848348       | 0.24725        | 0.81385        | <b>1.47 × 10<sup>-5</sup></b> |
| Proteobacteria  | <i>Sutterella</i>    | 3.16174        | 0.003268989    | 0              | 0.01057        | <b>0.033548925</b>            |

values in bold are statistically significant.
